# Supplementary material for: Opto-electrical evaluation of visible blind fast-response nanostructured SnO2/Si photodetector
Source: Royal Society of Chemistry journal article supplement (doi:10.1039/d4ra05303f), 2024-01-01
Supplement: d4ra05303f1.pdf [file d4ra05303f1.pdf]

## Supplementary Materials

### Opto-electrical evaluation of visible blind fast-response nanostructured SnO<sub>2</sub>/Si photodetector

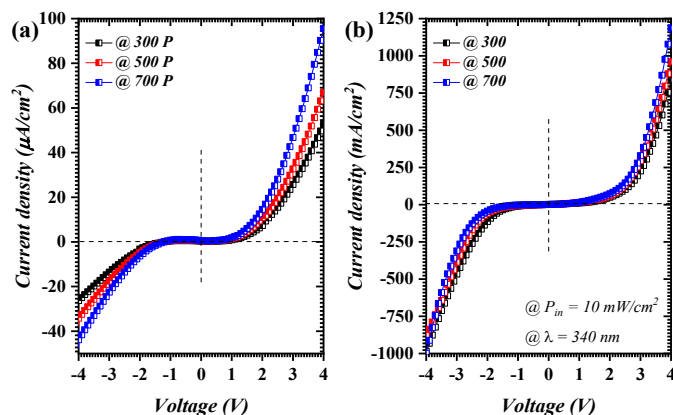

**Figure S1:** Opto-electrical features of the proposed devices as by means of laser pulses: (a) dark I-V and (b) illuminated I-V @ 340 nm, and 10 mW/cm<sup>2</sup>.

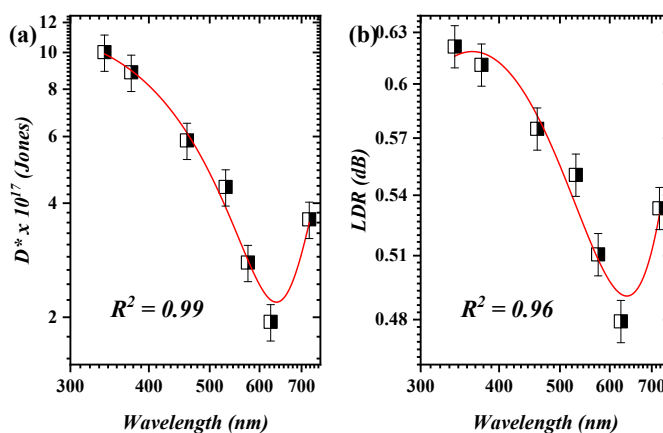

**Figure S2:** Opto-electrical features of the fabricated photodetector @ 700 pulses as a function of wavelength; (a) photo-detectivity and (b) linear dynamic range characteristics were attained @ 3 V and 10 mW/cm<sup>2</sup>.

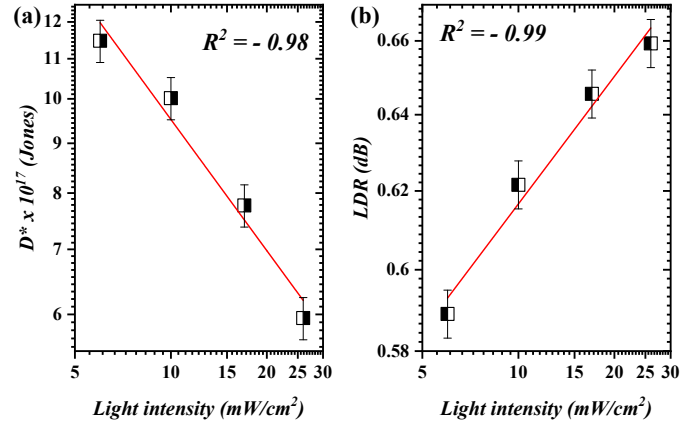

**Figure S3:** Opto-electrical features of the fabricated photodetector @ 700 pulses as a function of illumination power; (a) photo-detectivity and (b) linear dynamic range characteristics were attained @ 3 V and  $\lambda = 340 \text{ nm}$ .

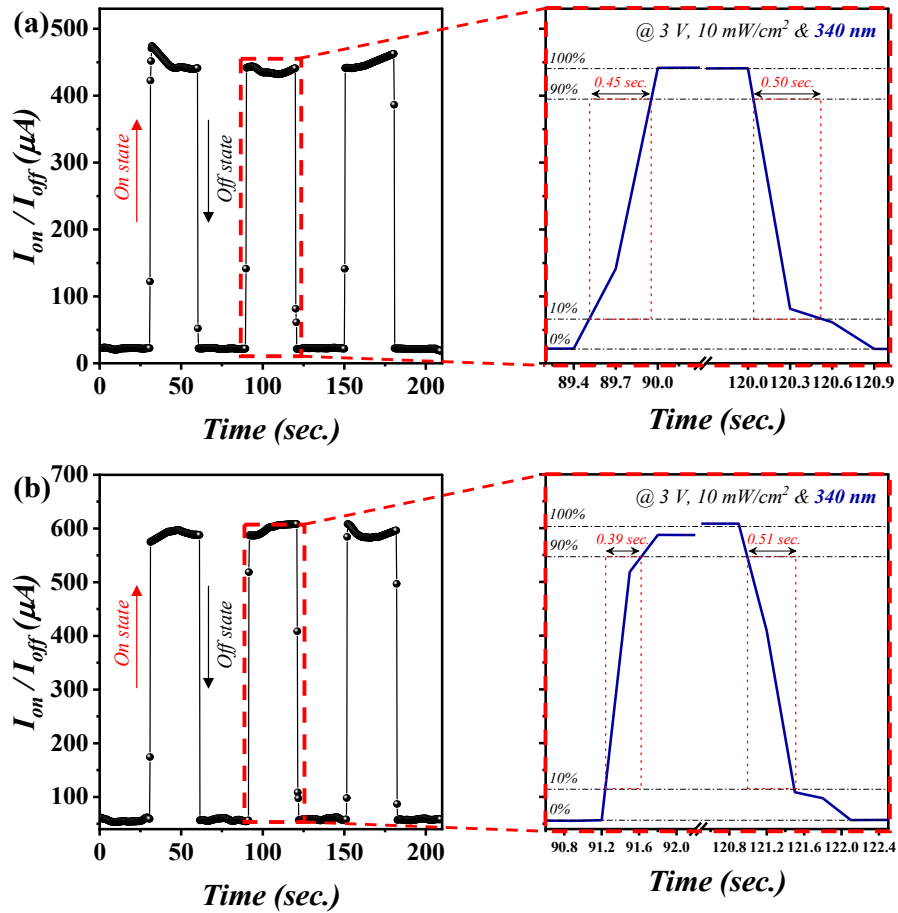

**Figure S4:** Time-resolved characteristics of the fabricated devices at (a) 300 pulses and (b) 500 pulses.
